# Supplementary material
Source: publisher figshare collection journal article supplement (https://tandf.figshare.com/articles/dataset/_/5146582)
Supplement: Supplementary file 1 [file 1]

# Supplement of “The Bayes Rule of the Parameter in (0,1) under the Power-Log Loss Function with an Application to the Beta-Binomial Model” \*

Ying-Ying Zhang<sup>a,\*</sup>, Ming-Qin Zhou<sup>a</sup>, Yu-Han Xie<sup>a</sup>, Wen-He Song<sup>a</sup>

<sup>a</sup>*Department of Statistics and Actuarial Science, College of Mathematics and Statistics, Chongqing University, Chongqing, China*

---

## Abstract

This is the supplemental file of the paper.

---

**The proof of**  $L(\theta + \Delta a|\theta) = o(\Delta a)$ . By property (f), the definition of derivative, and assume the validity of interchanging the order of limitation and evaluation, we have

$$\begin{aligned} 0 &= \left[ \frac{\partial}{\partial a} L(a|\theta) \right] \Big|_{a=\theta} = \left[ \lim_{\Delta a \rightarrow 0} \frac{L(a + \Delta a|\theta) - L(a|\theta)}{\Delta a} \right] \Big|_{a=\theta} \\ &= \lim_{\Delta a \rightarrow 0} \left[ \frac{L(a + \Delta a|\theta) - L(a|\theta)}{\Delta a} \Big|_{a=\theta} \right] \\ &= \lim_{\Delta a \rightarrow 0} \frac{L(\theta + \Delta a|\theta) - L(\theta|\theta)}{\Delta a} = \lim_{\Delta a \rightarrow 0} \frac{L(\theta + \Delta a|\theta)}{\Delta a}, \end{aligned}$$

that is,  $L(\theta + \Delta a|\theta) = o(\Delta a)$ . □

**The check that the power-log loss function satisfies all the 6 properties listed in Table 1.** Now we check that the power-log loss function,  $L_{pl}(\theta, a) = L_{pl}(a|\theta) = L_{pl}(x)|_{x=a/\theta}$ , satisfies all the 6 properties listed in Table 1. Let

$$g(x) = \frac{\left(\frac{1}{\theta} - 1\right)^2}{\frac{1}{\theta} - x} - \log x \text{ and } g(1) = \frac{1}{\theta} - 1.$$

---

\*The research was supported by the Fundamental Research Funds for the Central Universities (CQDXWL-2012-004).

\*Corresponding author

Email addresses: robertzhang@cqu.edu.cn or robertzhangyiyi@qq.com (Ying-Ying Zhang), 1026250991@qq.com (Ming-Qin Zhou), 545552727@qq.com (Yu-Han Xie), wenhesong@163.com (Wen-He Song)

URL: <https://zhangyingying319.wordpress.com> (Ying-Ying Zhang)

We have

$$L_{pl}(x) = g(x) - g(1) = \frac{\left(\frac{1}{\theta} - 1\right)^2}{\frac{1}{\theta} - x} - \log x - \left(\frac{1}{\theta} - 1\right)$$

and

$$\begin{aligned} L_{pl}(\theta, a) &= L_{pl}(a|\theta) = L_{pl}(x)|_{x=a/\theta} = \frac{\left(\frac{1}{\theta} - 1\right)^2}{\frac{1}{\theta} - \frac{a}{\theta}} - \log \frac{a}{\theta} - \left(\frac{1}{\theta} - 1\right) \\ &= \frac{\theta \left(\frac{1}{\theta} - 1\right)^2}{1 - a} - \log a + \log \theta - \left(\frac{1}{\theta} - 1\right). \end{aligned}$$

We first show that  $L_{pl}(x)$  satisfies all the 6 properties listed in Table 1. First,

$$L_{pl}(1) = g(1) - g(1) = 0,$$

so property (b) is proved. Properties (c) and (d) can be checked directly. For property (f), we have

$$g'(x) = \left(\frac{1}{\theta} - 1\right)^2 \frac{1}{\left(\frac{1}{\theta} - x\right)^2} - \frac{1}{x}.$$

Thus,

$$L'_{pl}(1) = g'(1) = \left(\frac{1}{\theta} - 1\right)^2 \frac{1}{\left(\frac{1}{\theta} - 1\right)^2} - \frac{1}{1} = 0.$$

Now we turn to property (e). We have

$$\begin{aligned} L''_{pl}(x) &= g''(x) = [g'(x)]' = \left[ \left(\frac{1}{\theta} - 1\right)^2 \left(\frac{1}{\theta} - x\right)^{-2} - x^{-1} \right]' \\ &= \left(\frac{1}{\theta} - 1\right)^2 2 \left(\frac{1}{\theta} - x\right)^{-3} + x^{-2} > 0, \end{aligned}$$

since  $0 < x < \frac{1}{\theta}$  and  $0 < \theta < 1$ . Therefore,  $L_{pl}(x)$  is convex in  $x$  and property (e) is proved. With properties (b), (e), and (f), we can prove that

$$L_{pl}(x) \geq 0 \text{ for all } 0 < x < \frac{1}{\theta},$$

that is, property (a) is proved.

Now we prove that  $L_{pl}(\theta, a) = L_{pl}(a|\theta)$  satisfies all the 6 properties listed in Table 1. Properties (a), (b), (c), and (d) are satisfied by exploiting

$$L_{pl}(\theta, a) = L_{pl}(a|\theta) = L_{pl}(x)|_{x=a/\theta},$$

and that  $L_{pl}(x)$  satisfies these properties. For property (f), we have

$$\left[ \frac{\partial}{\partial a} L_{pl}(a|\theta) \right] \Big|_{a=\theta} = \left[ \frac{\partial x}{\partial a} \cdot \frac{\partial}{\partial x} L_{pl}(x) \right] \Big|_{x=1} = \frac{1}{\theta} L'_{pl}(1) = 0.$$

For property (e), we have

$$\begin{aligned} \frac{\partial^2}{\partial a^2} L_{pl}(a|\theta) &= \frac{\partial}{\partial a} \left[ \frac{\partial}{\partial a} L_{pl}(a|\theta) \right] = \frac{\partial}{\partial a} \left\{ \left[ \frac{\partial x}{\partial a} \cdot \frac{\partial}{\partial x} L_{pl}(x) \right] \Big|_{x=a/\theta} \right\} \\ &= \frac{1}{\theta} \frac{\partial}{\partial a} \left\{ \left[ \frac{\partial}{\partial x} L_{pl}(x) \right] \Big|_{x=a/\theta} \right\} = \frac{1}{\theta} \left\{ \left[ \frac{\partial x}{\partial a} \cdot \frac{\partial^2}{\partial x^2} L_{pl}(x) \right] \Big|_{x=a/\theta} \right\} \\ &= \frac{1}{\theta^2} L''_{pl}(x) \Big|_{x=a/\theta} > 0. \end{aligned}$$

Therefore,  $L_{pl}(a|\theta)$  is convex in  $a$  and property (e) is proved. The check is complete.  $\square$

**The proof of  $\delta_{pl}^\pi(\mathbf{x}) \leq \delta_2^\pi(\mathbf{x})$ .** We have

$$\delta_{pl}^\pi(\mathbf{x}) = \frac{2 + E_1(\mathbf{x}) - \sqrt{E_1(\mathbf{x})(E_1(\mathbf{x}) + 4)}}{2} \leq E_4(\mathbf{x}) = \delta_2^\pi(\mathbf{x}) \quad (1)$$

$$\Leftrightarrow 2 + E_1(\mathbf{x}) - \sqrt{E_1(\mathbf{x})(E_1(\mathbf{x}) + 4)} \leq 2E_4(\mathbf{x})$$

$$\Leftrightarrow 2 + E_1(\mathbf{x}) - 2E_4(\mathbf{x}) \leq \sqrt{E_1(\mathbf{x})(E_1(\mathbf{x}) + 4)}$$

$$\Leftrightarrow [2 + E_1(\mathbf{x}) - 2E_4(\mathbf{x})]^2 \leq E_1(\mathbf{x})(E_1(\mathbf{x}) + 4)$$

$$\Leftrightarrow 4 + E_1^2(\mathbf{x}) + 4E_4^2(\mathbf{x}) + 4E_1(\mathbf{x}) - 8E_4(\mathbf{x}) - 4E_1(\mathbf{x})E_4(\mathbf{x}) \leq E_1^2(\mathbf{x}) + 4E_1(\mathbf{x})$$

$$\Leftrightarrow 4 + 4E_4^2(\mathbf{x}) \leq 8E_4(\mathbf{x}) + 4E_1(\mathbf{x})E_4(\mathbf{x})$$

$$\Leftrightarrow 1 + E_4^2(\mathbf{x}) \leq 2E_4(\mathbf{x}) + E_1(\mathbf{x})E_4(\mathbf{x})$$

$$\Leftrightarrow [1 - E_4(\mathbf{x})]^2 \leq E_1(\mathbf{x})E_4(\mathbf{x})$$

$$\Leftrightarrow [1 - E[\theta|\mathbf{x}]]^2 \leq E \left[ \frac{(1-\theta)^2}{\theta} | \mathbf{x} \right] E[\theta|\mathbf{x}]$$

$$\Leftrightarrow [E[1 - \theta|\mathbf{x}]]^2 \leq E \left[ \frac{(1-\theta)^2}{\theta} | \mathbf{x} \right] E[\theta|\mathbf{x}]. \quad (2)$$

We need the Covariance Inequality (see Theorem 4.7.9 (p.192) in Casella and Berger (2002)) for the rest of the proof. For convenience, we quote it here.

**Theorem (Covariance Inequality)** *Let  $X$  be any random variable and  $g(x)$  and  $h(x)$  any functions such that  $Eg(X)$ ,  $Eh(X)$ , and  $E(g(X)h(X))$  exist.*

*a. If  $g(x)$  is a nondecreasing function and  $h(x)$  is a nonincreasing function, then*

$$E(g(X)h(X)) \leq (Eg(X))(Eh(X)).$$

*b. If  $g(x)$  and  $h(x)$  are either both nondecreasing or both nonincreasing, then*

$$E(g(X)h(X)) \geq (Eg(X))(Eh(X)).$$

Let  $X = (\theta|\mathbf{x})$ . It is easy to check that  $g(\theta) = \frac{(1-\theta)^2}{\theta}$  is a decreasing function of  $\theta$ , and  $h(\theta) = \theta$  is an increasing function of  $\theta$ . Thus, by the Covariance Inequality, we have

$$E\left[\frac{(1-\theta)^2}{\theta}|\mathbf{x}\right] E[\theta|\mathbf{x}] \geq E\left[(1-\theta)^2|\mathbf{x}\right] = E[(1-\theta)(1-\theta)|\mathbf{x}].$$

Now we let  $g(\theta) = 1 - \theta$  which is a decreasing function of  $\theta$ , and  $h(\theta) = 1 - \theta$  which is again a decreasing function of  $\theta$ . Therefore, by the Covariance Inequality, we have

$$E[(1-\theta)(1-\theta)|\mathbf{x}] \geq E(1-\theta|\mathbf{x}) E(1-\theta|\mathbf{x}) = [E(1-\theta|\mathbf{x})]^2.$$

Therefore, (2) is correct and (1) is proved.  $\square$

**The calculation of  $\pi(\theta|\mathbf{x}) \sim Be(\alpha^*, \beta^*)$ .** Suppose that we observe  $X_1, X_2, \dots, X_n$  from the beta-binomial model:

$$\begin{cases} X_i|\theta \stackrel{\text{iid}}{\sim} \text{Bin}(m, \theta), \quad i = 1, 2, \dots, n, \\ \theta \sim Be(\alpha, \beta), \end{cases}$$

where  $m$  is a known positive integer,  $\alpha > 0$  and  $\beta > 0$  are known constants,  $\theta \in (0, 1)$  is the unknown parameter of interest,  $\text{Bin}(m, \theta)$  is the binomial distribution, and  $Be(\alpha, \beta)$  is the beta distribution. By the Bayes Theorem, we have

$$\pi(\theta|\mathbf{x}) \propto f(\mathbf{x}|\theta) \pi(\theta).$$

It is easy to see that

$$\pi(\theta) \propto \theta^{\alpha-1} (1-\theta)^{\beta-1}, \quad \theta \in (0, 1), \quad \alpha, \beta > 0,$$

and

$$f(\mathbf{x}|\theta) = \prod_{i=1}^n f(x_i|\theta) = \prod_{i=1}^n \left[ \binom{m}{x_i} \theta^{x_i} (1-\theta)^{m-x_i} \right] \propto \theta^{\sum_{i=1}^n x_i} (1-\theta)^{mn - \sum_{i=1}^n x_i}.$$

Therefore,

$$\begin{aligned} \pi(\theta|\mathbf{x}) &\propto \theta^{\sum_{i=1}^n x_i} (1-\theta)^{mn - \sum_{i=1}^n x_i} \theta^{\alpha-1} (1-\theta)^{\beta-1} \\ &= \theta^{(\sum_{i=1}^n x_i + \alpha) - 1} (1-\theta)^{(mn - \sum_{i=1}^n x_i + \beta) - 1} \\ &\sim Be(\alpha^*, \beta^*), \end{aligned}$$

where

$$\alpha^* = \sum_{i=1}^n x_i + \alpha \text{ and } \beta^* = mn - \sum_{i=1}^n x_i + \beta.$$

The calculation is complete.  $\square$

**The calculations of  $E_i(\mathbf{x})$ ,  $i = 1, 2, 3, 4$ .** The posterior distribution of  $\theta$  is

$$\pi(\theta|\mathbf{x}) \sim Be(\alpha^*, \beta^*).$$

We calculate  $E_1(\mathbf{x})$ ,  $E_3(\mathbf{x})$ , and  $E_4(\mathbf{x})$  first, since the calculations are straightforward. Then we calculate  $E_2(\mathbf{x})$ , which is sophisticated. We have

$$\begin{aligned} E_1(\mathbf{x}) &= E\left[\theta^{-1} (1-\theta)^2 | \mathbf{x}\right] = \int_0^1 \theta^{-1} (1-\theta)^2 \pi(\theta|\mathbf{x}) d\theta \\ &= \int_0^1 \theta^{-1} (1-\theta)^2 \frac{\Gamma(\alpha^* + \beta^*)}{\Gamma(\alpha^*) \Gamma(\beta^*)} \theta^{\alpha^*-1} (1-\theta)^{\beta^*-1} d\theta \\ &= \frac{\Gamma(\alpha^* + \beta^*)}{\Gamma(\alpha^*) \Gamma(\beta^*)} \int_0^1 \theta^{(\alpha^*-1)-1} (1-\theta)^{(\beta^*+2)-1} d\theta \\ &= \frac{\Gamma(\alpha^* + \beta^*)}{\Gamma(\alpha^*) \Gamma(\beta^*)} B(\alpha^* - 1, \beta^* + 2) \\ &= \frac{\Gamma(\alpha^* + \beta^*)}{\Gamma(\alpha^*) \Gamma(\beta^*)} \frac{\Gamma(\alpha^* - 1) \Gamma(\beta^* + 2)}{\Gamma(\alpha^* + \beta^* + 1)} \\ &= \frac{(\beta^* + 1) \beta^*}{(\alpha^* - 1)(\alpha^* + \beta^*)}, \text{ for } \alpha^* > 1, \end{aligned}$$

$$\begin{aligned}
E_3(\mathbf{x}) &= \mathbb{E}[\theta^{-1}|\mathbf{x}] = \int_0^1 \theta^{-1} \pi(\theta|\mathbf{x}) d\theta \\
&= \int_0^1 \theta^{-1} \frac{\Gamma(\alpha^* + \beta^*)}{\Gamma(\alpha^*) \Gamma(\beta^*)} \theta^{\alpha^*-1} (1-\theta)^{\beta^*-1} d\theta \\
&= \frac{\Gamma(\alpha^* + \beta^*)}{\Gamma(\alpha^*) \Gamma(\beta^*)} \int_0^1 \theta^{(\alpha^*-1)-1} (1-\theta)^{\beta^*-1} d\theta \\
&= \frac{\Gamma(\alpha^* + \beta^*)}{\Gamma(\alpha^*) \Gamma(\beta^*)} B(\alpha^* - 1, \beta^*) \\
&= \frac{\Gamma(\alpha^* + \beta^*)}{\Gamma(\alpha^*) \Gamma(\beta^*)} \frac{\Gamma(\alpha^* - 1) \Gamma(\beta^*)}{\Gamma(\alpha^* + \beta^* - 1)} \\
&= \frac{\alpha^* + \beta^* - 1}{\alpha^* - 1}, \text{ for } \alpha^* > 1,
\end{aligned}$$

and

$$E_4(\mathbf{x}) = \mathbb{E}[\theta|\mathbf{x}] = \frac{\alpha^*}{\alpha^* + \beta^*}.$$

Now we calculate  $E_2(\mathbf{x})$ . We have

$$\begin{aligned}
E_2(\mathbf{x}) &= \mathbb{E}[\log \theta|\mathbf{x}] = \int_0^1 (\log \theta) \pi(\theta|\mathbf{x}) d\theta \\
&= \int_0^1 (\log \theta) \frac{\Gamma(\alpha^* + \beta^*)}{\Gamma(\alpha^*) \Gamma(\beta^*)} \theta^{\alpha^*-1} (1-\theta)^{\beta^*-1} d\theta \\
&= \frac{\Gamma(\alpha^* + \beta^*)}{\Gamma(\alpha^*) \Gamma(\beta^*)} \int_0^1 (\log \theta) \theta^{\alpha^*-1} (1-\theta)^{\beta^*-1} d\theta \\
&= \frac{\Gamma(\alpha^* + \beta^*)}{\Gamma(\alpha^*) \Gamma(\beta^*)} I_1,
\end{aligned}$$

where

$$\begin{aligned}
I_1 &= \int_0^1 (\log \theta) \theta^{\alpha^*-1} (1-\theta)^{\beta^*-1} d\theta \\
&= \int_0^1 \frac{d\theta^{\alpha^*-1}}{d\alpha^*} (1-\theta)^{\beta^*-1} d\theta \\
&= \int_0^1 \frac{d}{d\alpha^*} \left( \theta^{\alpha^*-1} (1-\theta)^{\beta^*-1} \right) d\theta \\
&= \frac{d}{d\alpha^*} \int_0^1 \theta^{\alpha^*-1} (1-\theta)^{\beta^*-1} d\theta \\
&= \frac{d}{d\alpha^*} B(\alpha^*, \beta^*) \\
&= \frac{d}{d\alpha^*} \left( \frac{\Gamma(\alpha^*) \Gamma(\beta^*)}{\Gamma(\alpha^* + \beta^*)} \right) \\
&= \Gamma(\beta^*) \frac{d}{d\alpha^*} \left( \frac{\Gamma(\alpha^*)}{\Gamma(\alpha^* + \beta^*)} \right) \\
&= \Gamma(\beta^*) \frac{\Gamma'(\alpha^*) \Gamma(\alpha^* + \beta^*) - \Gamma(\alpha^*) \Gamma'(\alpha^* + \beta^*)}{\Gamma^2(\alpha^* + \beta^*)}.
\end{aligned}$$

Note that

$$\psi(z) = \frac{\Gamma'(z)}{\Gamma(z)} = \text{PolyGamma}(z) = \text{PolyGamma}(0, z) = \text{digamma}(z)$$

is the digamma function, and  $\Gamma(z)$  is the gamma function. In R software (R Core Team (2017)), the function `digamma(z)` calculates  $\psi(z)$ . Thus,

$$\Gamma'(z) = \Gamma(z) \psi(z).$$

Therefore,

$$\Gamma'(\alpha^*) = \Gamma(\alpha^*) \psi(\alpha^*)$$

and

$$\Gamma'(\alpha^* + \beta^*) = \Gamma(\alpha^* + \beta^*) \psi(\alpha^* + \beta^*).$$

Consequently,

$$\begin{aligned}
I_1 &= \frac{\Gamma(\beta^*)}{\Gamma^2(\alpha^* + \beta^*)} [\Gamma(\alpha^*) \psi(\alpha^*) \Gamma(\alpha^* + \beta^*) - \Gamma(\alpha^*) \Gamma(\alpha^* + \beta^*) \psi(\alpha^* + \beta^*)] \\
&= \frac{\Gamma(\alpha^*) \Gamma(\beta^*)}{\Gamma(\alpha^* + \beta^*)} [\psi(\alpha^*) - \psi(\alpha^* + \beta^*)].
\end{aligned}$$

Finally,

$$\begin{aligned} E_2(\mathbf{x}) &= \frac{\Gamma(\alpha^* + \beta^*)}{\Gamma(\alpha^*)\Gamma(\beta^*)} \frac{\Gamma(\alpha^*)\Gamma(\beta^*)}{\Gamma(\alpha^* + \beta^*)} [\psi(\alpha^*) - \psi(\alpha^* + \beta^*)] \\ &= \psi(\alpha^*) - \psi(\alpha^* + \beta^*). \end{aligned}$$

The calculations are complete.  $\square$

**The proof of**

$$\begin{aligned} \delta_{pl}^\pi(\mathbf{x}) &= 1 + \frac{(\beta^* + 1)\beta^*}{2(\alpha^* - 1)(\alpha^* + \beta^*)} - \frac{1}{2} \frac{1}{(\alpha^* - 1)(\alpha^* + \beta^*)} \\ &\quad \times \sqrt{(\beta^* + 1)\beta^*(4\alpha^{*2} + 4\alpha^*\beta^* - 4\alpha^* - 3\beta^* + \beta^{*2})} \\ &< \frac{\alpha^*}{\alpha^* + \beta^*} = \delta_2^\pi(\mathbf{x}). \end{aligned} \tag{3}$$

We have, (3)

$$\begin{aligned} &\Longleftrightarrow 1 + \frac{(\beta^* + 1)\beta^*}{2(\alpha^* - 1)(\alpha^* + \beta^*)} - \frac{\alpha^*}{\alpha^* + \beta^*} \\ &< \frac{\sqrt{(\beta^* + 1)\beta^*(4\alpha^{*2} + 4\alpha^*\beta^* - 4\alpha^* - 3\beta^* + \beta^{*2})}}{2(\alpha^* - 1)(\alpha^* + \beta^*)} \\ &\Longleftrightarrow \frac{2(\alpha^* - 1)(\alpha^* + \beta^*) + (\beta^* + 1)\beta^* - 2(\alpha^* - 1)\alpha^*}{2(\alpha^* - 1)(\alpha^* + \beta^*)} \\ &< \frac{\sqrt{(\beta^* + 1)\beta^*(4\alpha^{*2} + 4\alpha^*\beta^* - 4\alpha^* - 3\beta^* + \beta^{*2})}}{2(\alpha^* - 1)(\alpha^* + \beta^*)} \\ &\Longleftrightarrow 2(\alpha^* - 1)\beta^* + (\beta^* + 1)\beta^* < \sqrt{(\beta^* + 1)\beta^*(4\alpha^{*2} + 4\alpha^*\beta^* - 4\alpha^* - 3\beta^* + \beta^{*2})} \\ &\Longleftrightarrow \beta^*(2\alpha^* + \beta^* - 1) < \sqrt{(\beta^* + 1)\beta^*(4\alpha^{*2} + 4\alpha^*\beta^* - 4\alpha^* - 3\beta^* + \beta^{*2})} \\ &\Longleftrightarrow \beta^*(2\alpha^* + \beta^* - 1)^2 < (\beta^* + 1)(4\alpha^{*2} + 4\alpha^*\beta^* - 4\alpha^* - 3\beta^* + \beta^{*2}). \end{aligned} \tag{4}$$



It is easy to obtain

$$\begin{aligned}
& 4\alpha^{*2} + 4\alpha^*\beta^* - 4\alpha^* - 3\beta^* + \beta^{*2} \\
&= (2\alpha^* + \beta^* - 1)(2\alpha^* + \beta^*) - 2(\alpha^* + \beta^*) \\
&= (2\alpha^* + \beta^* - 1)(2\alpha^* + \beta^* - 1 + 1) - 2(\alpha^* + \beta^*) \\
&= (2\alpha^* + \beta^* - 1)^2 + (2\alpha^* + \beta^* - 1) - 2(\alpha^* + \beta^*) \\
&= (2\alpha^* + \beta^* - 1)^2 - (\beta^* + 1).
\end{aligned}$$

Therefore, (4)

$$\begin{aligned}
& \Longleftrightarrow \beta^*(2\alpha^* + \beta^* - 1)^2 < (\beta^* + 1) \left[ (2\alpha^* + \beta^* - 1)^2 - (\beta^* + 1) \right] \\
& \Longleftrightarrow \beta^*(2\alpha^* + \beta^* - 1)^2 < (\beta^* + 1)(2\alpha^* + \beta^* - 1)^2 - (\beta^* + 1)^2 \\
& \Longleftrightarrow (\beta^* + 1)^2 < (2\alpha^* + \beta^* - 1)^2.
\end{aligned} \tag{5}$$

Since  $\alpha^* > 1$  and  $\beta^* > 0$ , we obtain

$$2\alpha^* + \beta^* - 1 > 2 + \beta^* - 1 = \beta^* + 1 > 0.$$

Therefore, (5) is correct and (3) is proved.  $\square$

**The derivations of the moment estimators and the MLEs of  $\alpha$  and  $\beta$ .**

Suppose that we observe  $X_1, X_2, \dots, X_n$  from the beta-binomial model:

$$\begin{cases} X_i | \theta \stackrel{\text{iid}}{\sim} \text{Bin}(m, \theta), \quad i = 1, 2, \dots, n, \\ \theta \sim \text{Be}(\alpha, \beta), \end{cases}$$

where  $m$  is a known positive integer,  $\alpha > 0$  and  $\beta > 0$  are unknown hyperparameters determined by the empirical Bayes method,  $\theta \in (0, 1)$  is the unknown parameter of interest,  $\text{Bin}(m, \theta)$  is the binomial distribution, and  $\text{Be}(\alpha, \beta)$  is the beta distribution.

We first derive the moment estimators of  $\alpha$  and  $\beta$ . The expectation and variance of  $X$  are respectively given by

$$\text{EX} = m \frac{\alpha}{\alpha + \beta} \text{ and } \text{Var}(X) = m \frac{\alpha\beta(\alpha + \beta + m)}{(\alpha + \beta)^2(\alpha + \beta + 1)}.$$

See Examples 4.4.6 and 4.4.8 of Casella and Berger (2002) for details. The moment estimators of  $\alpha$  and  $\beta$  are calculated by equating the population moments to the sample moments, that is,

$$\begin{aligned} EX &= m \frac{\alpha}{\alpha + \beta} = \bar{X} = \frac{1}{n} \sum_{i=1}^n X_i = A_1, \\ \text{Var}(X) &= m \frac{\alpha\beta(\alpha + \beta + m)}{(\alpha + \beta)^2(\alpha + \beta + 1)} = \frac{1}{n} \sum_{i=1}^n (X_i - \bar{X})^2 = M_2, \end{aligned}$$

where  $A_1$  is the sample first-order moment of  $X$  and  $M_2$  is the sample second-order central moment of  $X$ . Solving the above equations, we obtain the moment estimators of  $\alpha$  and  $\beta$ :

$$\begin{aligned} \alpha_1 = \tilde{\alpha} &= \frac{M_2 A_1 - A_1^2 (m - A_1)}{A_1 (m - A_1) - M_2 m}, \\ \beta_1 = \tilde{\beta} &= \frac{(m - A_1) \alpha_1}{A_1}. \end{aligned}$$

Now we derive the MLEs of  $\alpha$  and  $\beta$ ,  $\alpha_2$  and  $\beta_2$ . The marginal distribution of  $X$  is a beta-binomial distribution (BBD) with probability mass function

$$\begin{aligned} m(x|\alpha, \beta) &= P(X = x|\alpha, \beta) = \binom{m}{x} \frac{B(x + \alpha, m - x + \beta)}{B(\alpha, \beta)} \\ &= \binom{m}{x} \frac{\Gamma(\alpha + \beta)}{\Gamma(\alpha)\Gamma(\beta)} \frac{\Gamma(x + \alpha)\Gamma(m - x + \beta)}{\Gamma(m + \alpha + \beta)}, \end{aligned}$$

where  $B(\alpha, \beta)$  is the beta function and  $\Gamma(\alpha)$  is the gamma function. Then the likelihood function of  $\alpha$  and  $\beta$  is

$$\begin{aligned} L(\alpha, \beta|\mathbf{x}) &= m(\mathbf{x}|\alpha, \beta) = \prod_{i=1}^n m(x_i|\alpha, \beta) \\ &= \prod_{i=1}^n \left[ \binom{m}{x_i} \frac{\Gamma(\alpha + \beta)}{\Gamma(\alpha)\Gamma(\beta)} \frac{\Gamma(x_i + \alpha)\Gamma(m - x_i + \beta)}{\Gamma(m + \alpha + \beta)} \right] \\ &= \left[ \prod_{i=1}^n \binom{m}{x_i} \right] \frac{\Gamma^n(\alpha + \beta)}{\Gamma^n(\alpha)\Gamma^n(\beta)\Gamma^n(m + \alpha + \beta)} \left[ \prod_{i=1}^n \Gamma(x_i + \alpha)\Gamma(m - x_i + \beta) \right]. \end{aligned}$$

Consequently, the log-likelihood function of  $\alpha$  and  $\beta$  is

$$\begin{aligned} \log L(\alpha, \beta|\mathbf{x}) &= \log \prod_{i=1}^n \binom{m}{x_i} + n \log \Gamma(\alpha + \beta) - n \log \Gamma(\alpha) - n \log \Gamma(\beta) - n \log \Gamma(m + \alpha + \beta) \\ &\quad + \sum_{i=1}^n [\log \Gamma(x_i + \alpha) + \log \Gamma(m - x_i + \beta)]. \end{aligned}$$

Taking partial derivatives with respect to  $\alpha$  and  $\beta$  and setting them to zeros, we obtain

$$\begin{aligned}\frac{\partial}{\partial \alpha} \log L &= n \frac{\Gamma'(\alpha + \beta)}{\Gamma(\alpha + \beta)} - n \frac{\Gamma'(\alpha)}{\Gamma(\alpha)} - n \frac{\Gamma'(m + \alpha + \beta)}{\Gamma(m + \alpha + \beta)} + \sum_{i=1}^n \frac{\Gamma'(x_i + \alpha)}{\Gamma(x_i + \alpha)} = 0, \\ \frac{\partial}{\partial \beta} \log L &= n \frac{\Gamma'(\alpha + \beta)}{\Gamma(\alpha + \beta)} - n \frac{\Gamma'(\beta)}{\Gamma(\beta)} - n \frac{\Gamma'(m + \alpha + \beta)}{\Gamma(m + \alpha + \beta)} + \sum_{i=1}^n \frac{\Gamma'(m - x_i + \beta)}{\Gamma(m - x_i + \beta)} = 0.\end{aligned}$$

Since

$$\psi(x) = \frac{\Gamma'(x)}{\Gamma(x)} = \frac{d}{dx} \log \Gamma(x) = \text{digamma}(x)$$

which can be directly calculated in R software by `digamma(x)` (R Core Team (2017)), after some algebra, the above equations reduces to

$$\begin{aligned}f_1(\alpha, \beta) &= \psi(\alpha + \beta) - \psi(\alpha) - \psi(m + \alpha + \beta) + \frac{1}{n} \sum_{i=1}^n \psi(x_i + \alpha) = 0, \\ f_2(\alpha, \beta) &= \psi(\alpha + \beta) - \psi(\beta) - \psi(m + \alpha + \beta) + \frac{1}{n} \sum_{i=1}^n \psi(m - x_i + \beta) = 0.\end{aligned}\tag{6}$$

(7)

The Jacobian matrix of  $\alpha$  and  $\beta$  is given by

$$J = \begin{pmatrix} \frac{\partial f_1}{\partial \alpha} & \frac{\partial f_1}{\partial \beta} \\ \frac{\partial f_2}{\partial \alpha} & \frac{\partial f_2}{\partial \beta} \end{pmatrix} = \begin{pmatrix} J_{11} & J_{12} \\ J_{21} & J_{22} \end{pmatrix},$$

where

$$\begin{aligned}J_{11} &= \frac{\partial f_1}{\partial \alpha} = \psi'(\alpha + \beta) - \psi'(\alpha) - \psi'(m + \alpha + \beta) + \frac{1}{n} \sum_{i=1}^n \psi'(x_i + \alpha), \\ J_{12} &= \frac{\partial f_1}{\partial \beta} = \psi'(\alpha + \beta) - \psi'(m + \alpha + \beta), \\ J_{21} &= \frac{\partial f_2}{\partial \alpha} = \psi'(\alpha + \beta) - \psi'(m + \alpha + \beta), \\ J_{22} &= \frac{\partial f_2}{\partial \beta} = \psi'(\alpha + \beta) - \psi'(\beta) - \psi'(m + \alpha + \beta) + \frac{1}{n} \sum_{i=1}^n \psi'(m - x_i + \beta).\end{aligned}$$

Note that

$$\psi'(x) = \frac{d^2}{dx^2} \log \Gamma(x) = \text{trigamma}(x)$$

which can be directly calculated in R software by `trigamma(x)` (R Core Team (2017)). We can exploit Newton's method to solve the equations (6) and (7)

and to obtain the MLEs of  $\alpha$  and  $\beta$ ,  $\alpha_2$  and  $\beta_2$ . Note that the MLEs of  $\alpha$  and  $\beta$  are very sensitive to the initial estimators, and the moment estimators are usually proved to be good initial estimators.  $\square$

## References

- Casella, G. and Berger, R. L. (2002). *Statistical Inference*. Duxbury, USA. 2nd edition.
- R Core Team (2017). *R: A Language and Environment for Statistical Computing*. R Foundation for Statistical Computing, Vienna, Austria.
